# Supplementary material
Source: MDPI journal article supplement (https://www.mdpi.com/2073-4344/12/4/371)

## Supporting Information

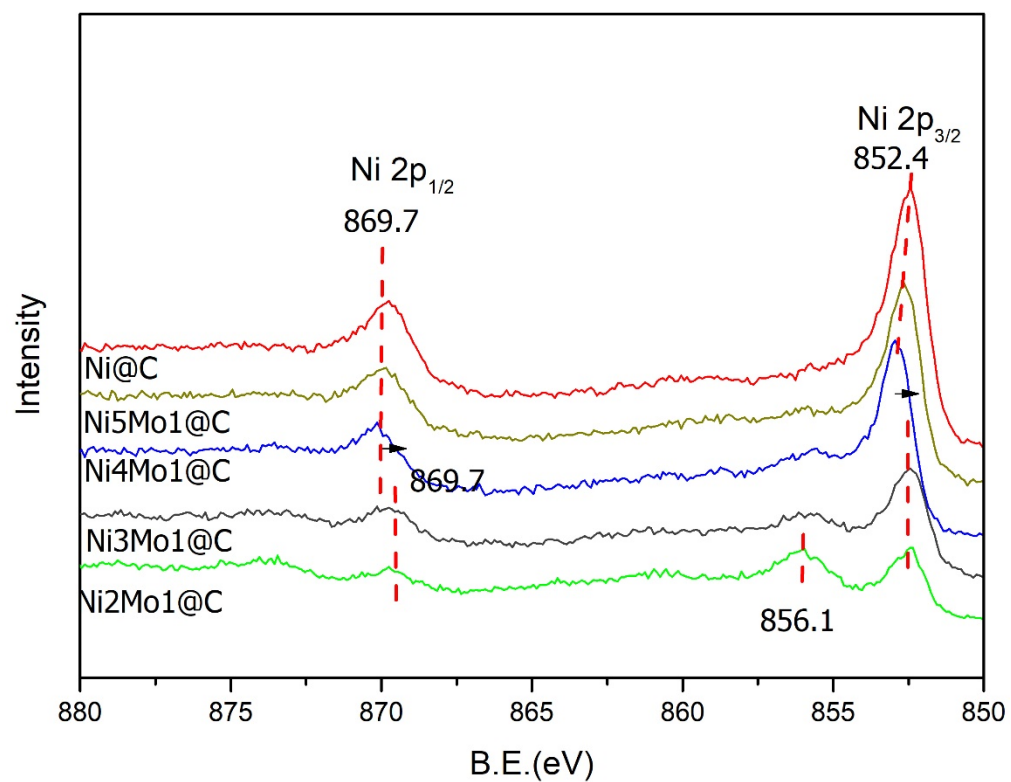

**Figure S1.** XPS of different NiMo@C catalysts

Supplement: s1 [file s1 › catalysts-1636600-supplementary.pdf]
